# Supplementary material
Source: PubMed Central journal article supplement (PMC2751545)

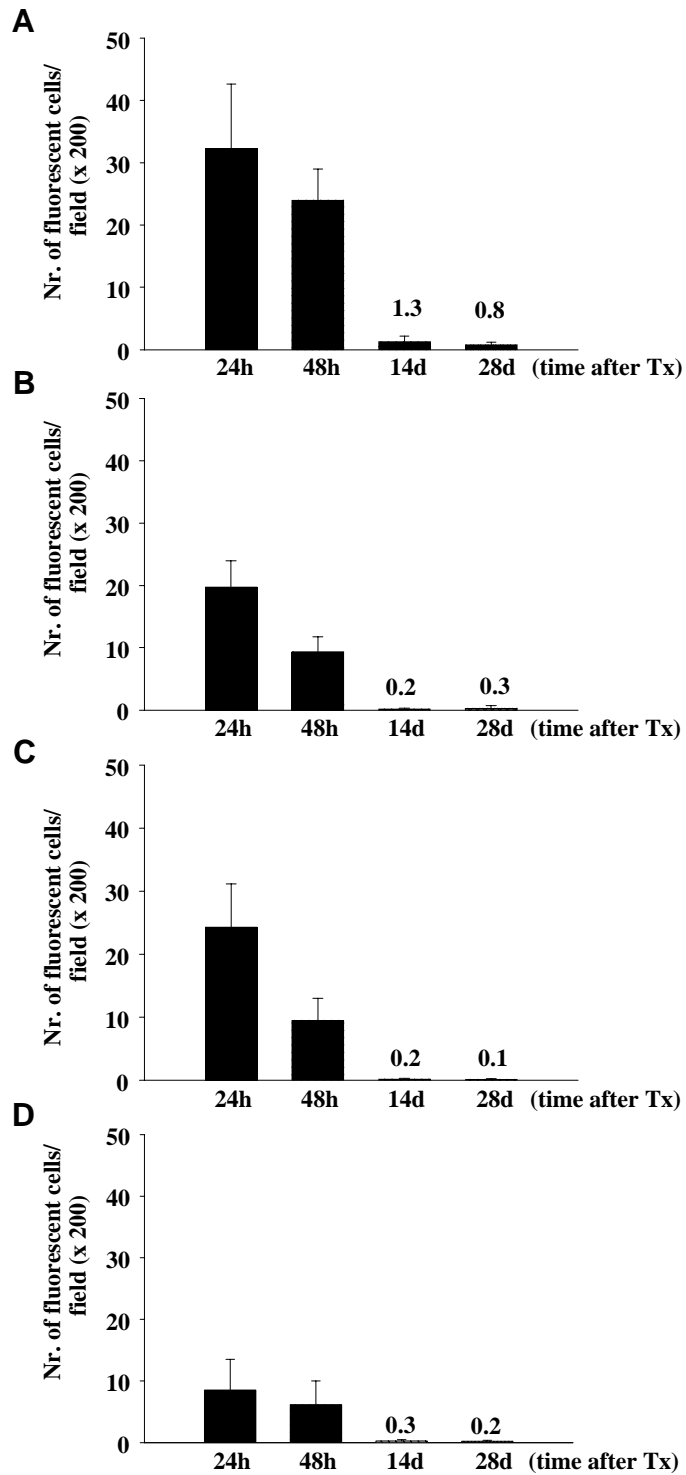

Supplemental Figure S1

Supplement: ajpath.2009.090117_1.pdf [file ajpath.2009.090117_1.pdf]

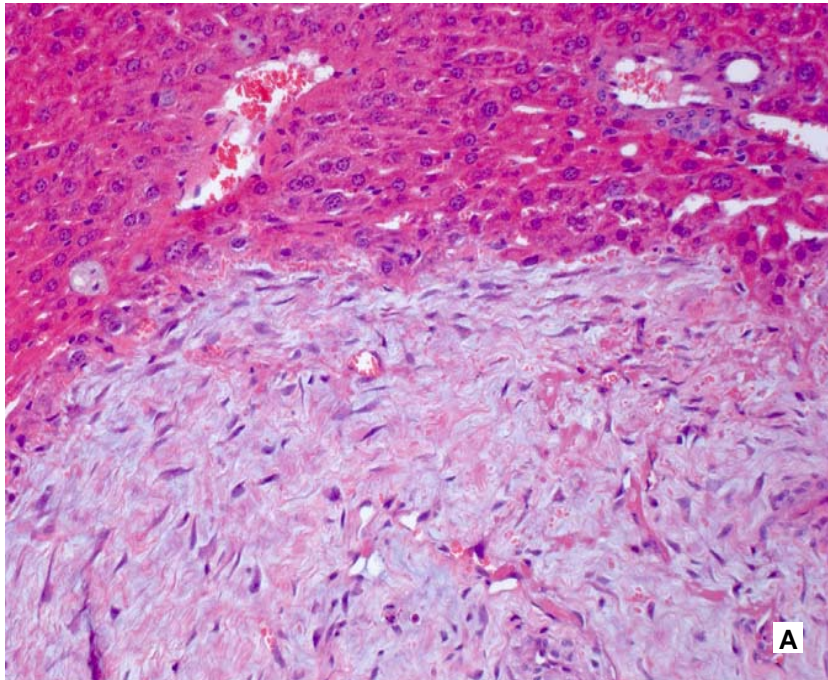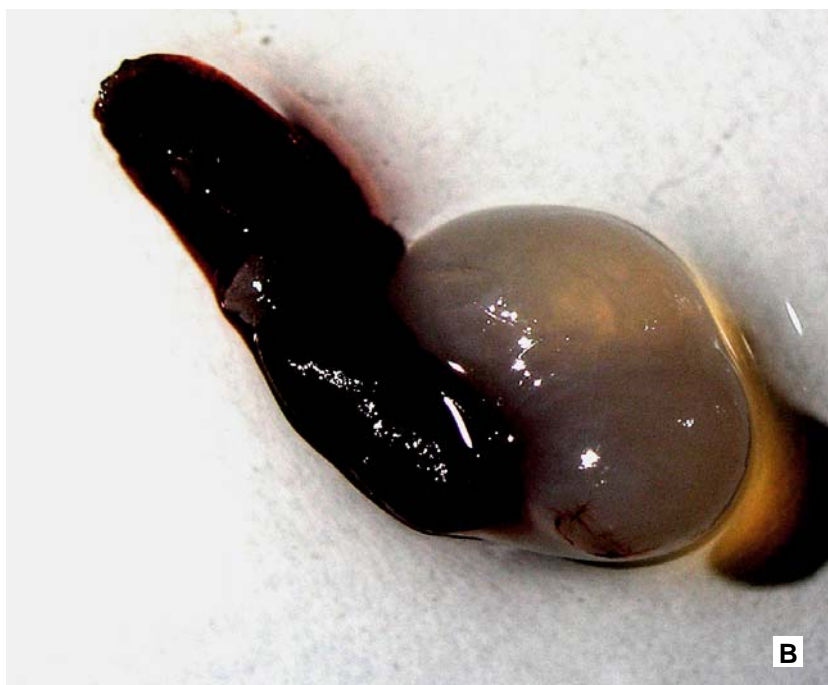

**Supplemental Figure S2**

Supplement: ajpath.2009.090117_2.pdf [file ajpath.2009.090117_2.pdf]
